# Supplementary material for: Polyethylene glycol–gelatin hydrogels with tuneable stiffness prepared by horseradish peroxidase-activated tetrazine–norbornene ligation
Source: Royal Society of Chemistry journal article supplement (doi:10.1039/c7tb02764h), 2018-01-01
Supplement: c7tb02764h1.pdf [file c7tb02764h1.pdf]

## **Polyethylene Glycol-Gelatin Hydrogels with Tuneable Stiffness Prepared by Horseradish Peroxidase-Activated Tetrazine-Norbornene Ligation**

J. Carthew<sup>a</sup>, J. E. Frith<sup>a</sup>, J. S. Forsythe<sup>a\*</sup>, and V. X. Truong<sup>a\*</sup>

### **Supporting Information**

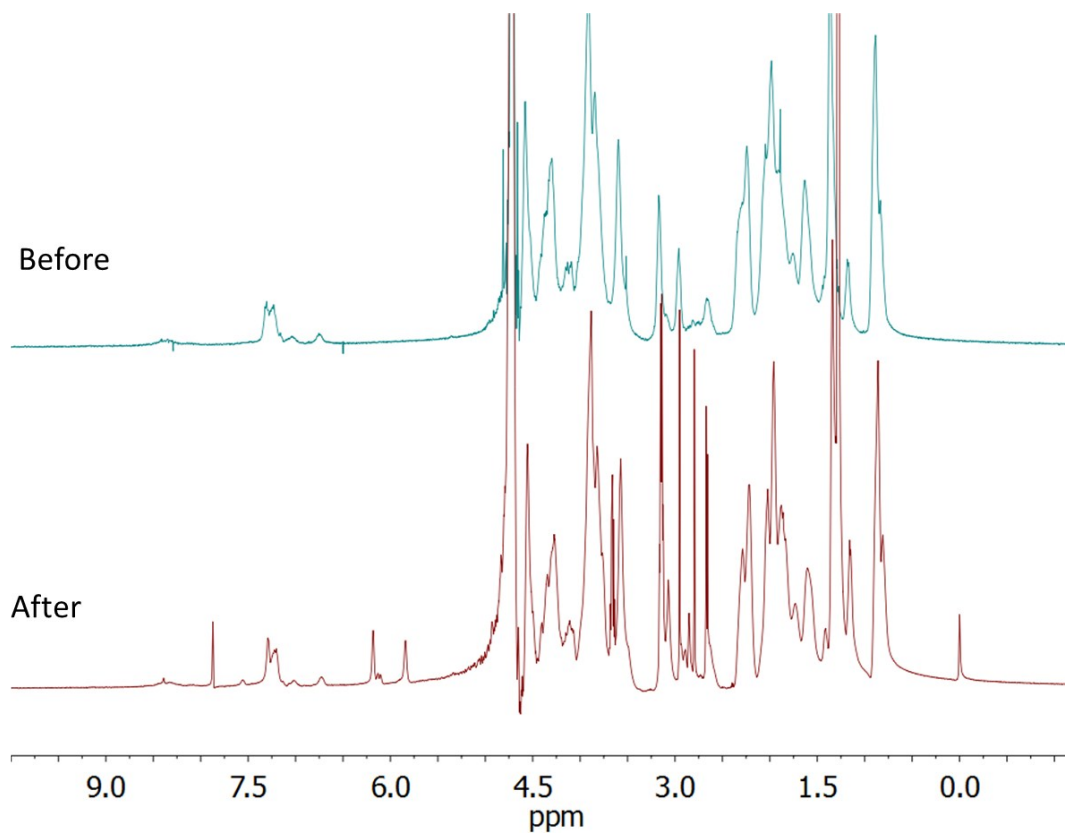

**Figure S1.**  $^1\text{H}$  NMR of gelatin and gelatin norbornene

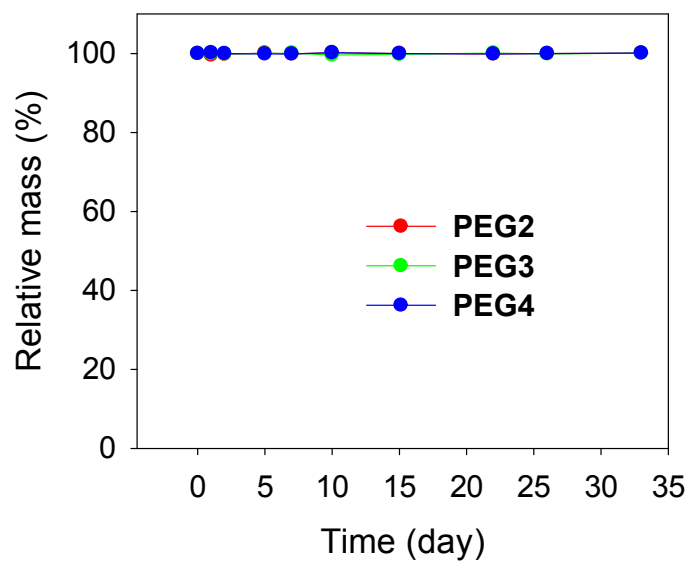

**Figure S2.** Degradation profiles of hydrogels as a function of relative weight of fully swollen gels in PBS pH 7.4, at 37 °C and without collagenase.

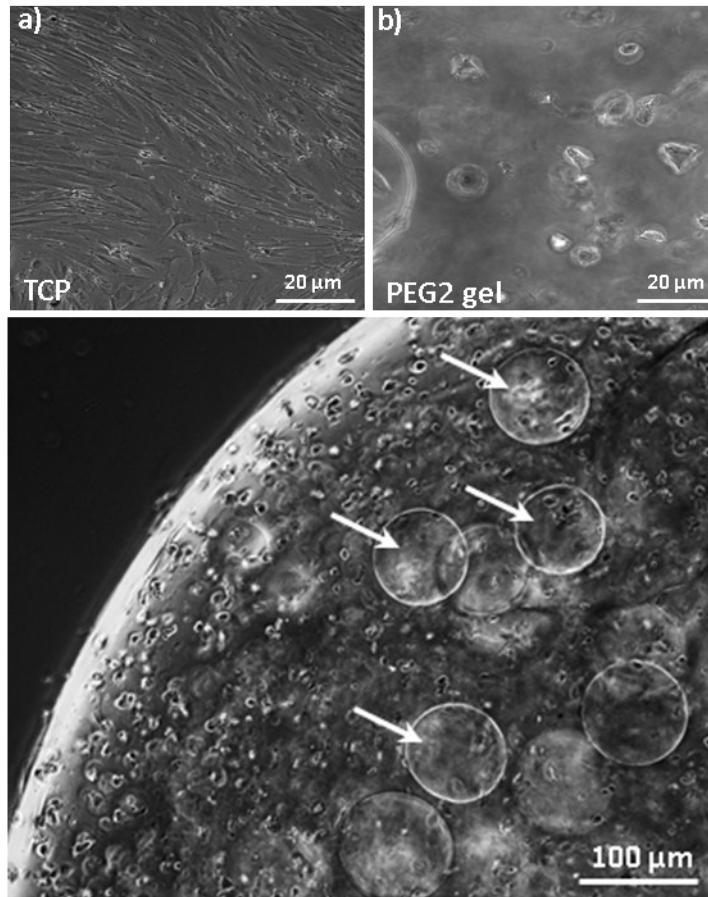

**Figure S3** a) Phase contrast images of hMSCs cultured on TCP (b) or within PEG-gelatin hydrogels following 24 h culture; c) low magnification phase contrast image of PEG-gelatin hydrogels seeded at 2.5 million cells per mL, small bubbles (areas indicated by white arrows) are from nitrogen gas released from Tz-Nb ligation.

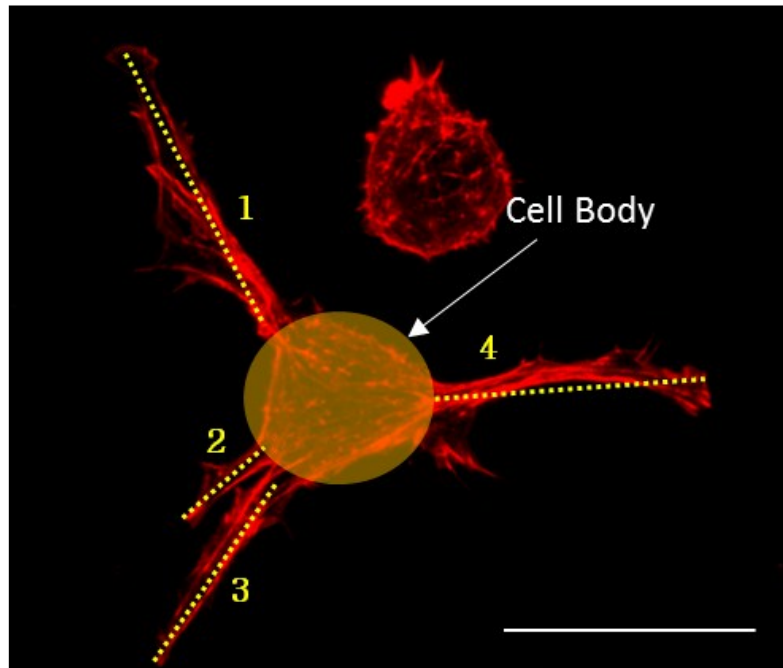

Cell projections were assessed if their length exceeded 50% of the length of the main body of the cell.

**Figure S4** Immunofluorescence image highlighting image analysis criteria for defining cell projections.
